# Supplementary material for: Single-crystal to single-crystal transformation from a 1-D chain-like structure to a 2-D coordination polymer on heating
Source: Royal Society of Chemistry journal article supplement (doi:10.1039/c3ce00060e), 2013-01-01
Supplement: c3ce00060e.pdf [file c3ce00060e.pdf]

## Supporting Information

### **Single-Crystal to Single-Crystal Transformation from a 1-D Chain-like Structure to a 2-D Coordination Polymer on Heating**

Xu-Jia Hong, Ming-Fang Wang, Hong-Guang Jin,\* Qing-Guang Zhan, Yi-Ting Liu,  
Hong-Yang Jia, Xiang Liu and Yue-Peng Cai\*

<sup>a</sup>School of Chemistry and Environment, South China Normal University Guangzhou, 510006, China

<sup>b</sup>State Key Laboratory of Coordination Chemistry, Nanjing University, Nanjing 210093, PR China

## Content

**Table S1** Crystal data and structure refinement of two compounds **1-2**.

**Table S2** Selected bond lengths and angles for the compounds **1-2**.

**Table S3** Distances (Å) and angles (°) of hydrogen bonds for the compounds **1-2**.

**Figure S1** Coordination environment of Er<sup>III</sup> ion and coordination mode of ClO<sub>4</sub><sup>-</sup> ion in **1**.

**Figure S2** The photo pictures of the single crystals of **1** and **2** before and after transformation.

**Figure S3** The TGA and DSC curves of compounds **1 (a)** and **2 (b)**.

**Figure S4** The topotactic transformation from **1** to **2**.

**Checkcif report** for compounds **1** (CCDC 897010) and **2** (CCDC 897011)

Table S1 Crystal data and structure refinement of two compounds **1-2**.

|                                                                  | <b>1</b>                                                          | <b>2</b>                                                        |
|------------------------------------------------------------------|-------------------------------------------------------------------|-----------------------------------------------------------------|
| Chemical formula                                                 | C <sub>9</sub> H <sub>16</sub> ClErN <sub>2</sub> O <sub>14</sub> | C <sub>9</sub> H <sub>4</sub> ClErN <sub>2</sub> O <sub>8</sub> |
| <i>M</i>                                                         | 578.95                                                            | 470.85                                                          |
| Crystal system                                                   | Triclinic                                                         | Triclinic                                                       |
| Space group                                                      | <i>P</i> -1                                                       | <i>P</i> -1                                                     |
| <i>a</i> /Å                                                      | 7.1312(12)                                                        | 6.8722(9)                                                       |
| <i>b</i> /Å                                                      | 9.5963(16)                                                        | 11.948(4)                                                       |
| <i>c</i> /Å                                                      | 12.431(2)                                                         | 10.9592(15)                                                     |
| <i>α</i> /°                                                      | 100.546(2)                                                        | 101.529(2)                                                      |
| <i>β</i> /°                                                      | 98.090(2)                                                         | 106.681(2)                                                      |
| <i>γ</i> /°                                                      | 95.025(2)                                                         | 95.551(2)                                                       |
| <i>V</i> /Å <sup>3</sup>                                         | 822.4(2)                                                          | 549.87(13)                                                      |
| <i>Z</i>                                                         | 2                                                                 | 2                                                               |
| <i>T</i> /K                                                      | 298(2)                                                            | 298(2)                                                          |
| <i>F</i> (000)                                                   | 562                                                               | 442                                                             |
| <i>D</i> <sub>calcd</sub> / g cm <sup>-3</sup>                   | 2.338                                                             | 2.844                                                           |
| <i>μ</i> /mm <sup>-1</sup>                                       | 5.347                                                             | 7.923                                                           |
| <i>λ</i> /Å                                                      | 0.71073                                                           | 0.71073                                                         |
| <i>R</i> <sub>int</sub>                                          | 0.0178                                                            | 0.0190                                                          |
| data/restraint/parm                                              | 2896 / 18 / 281                                                   | 1958 / 0 / 190                                                  |
| GOF                                                              | 1.043                                                             | 1.021                                                           |
| <i>R</i> <sub>1</sub> [ <i>I</i> = 2σ( <i>I</i> )] <sup>a</sup>  | 0.0283                                                            | 0.0241                                                          |
| <i>wR</i> <sub>2</sub> [ <i>I</i> = 2σ( <i>I</i> )] <sup>b</sup> | 0.0756                                                            | 0.0584                                                          |
| <i>R</i> <sub>1</sub> [all data] <sup>a</sup>                    | 0.0298                                                            | 0.0259                                                          |
| <i>wR</i> <sub>2</sub> [all data] <sup>b</sup>                   | 0.0764                                                            | 0.0594                                                          |

<sup>a</sup>  $R_1 = \sum ||F_o| - |F_c|| / \sum |F_o|$ , <sup>b</sup>  $wR_2 = [\sum w(F_o^2 - F_c^2)^2 / \sum w(F_o^2)^2]^{1/2}$ , where  $w = 1 / [\sigma^2(F_o^2) + (aP)_2 + bP]$ .  $P = (F_o^2 + 2F_c^2) / 3$ .

**Table S2.** Selected atomic distances (Å) and bond angles (°) for compounds 1-2<sup>a</sup>.

| <b>1</b>            |            |                     |            |
|---------------------|------------|---------------------|------------|
| Er(1)-O(1)          | 2.379(4)   | O(1)-Er(1)-O(10)    | 140.83(13) |
| Er(1)-O(10)         | 2.406(4)   | O(1)-Er(1)-O(6)#1   | 81.63(12)  |
| Er(1)-O(6)#1        | 2.441(4)   | O(10)-Er(1)-O(6)#1  | 137.39(13) |
| Er(1)-O(9)          | 2.442(4)   | O(1)-Er(1)-O(9)     | 76.21(13)  |
| Er(1)-O(11)         | 2.459(4)   | O(10)-Er(1)-O(9)    | 70.83(14)  |
| Er(1)-O(4)#2        | 2.483(4)   | O(6)#1-Er(1)-O(9)   | 143.78(13) |
| Er(1)-O(5)          | 2.508(4)   | O(1)-Er(1)-O(11)    | 140.55(13) |
| Er(1)-O(3)#2        | 2.534(4)   | O(10)-Er(1)-O(11)   | 69.63(14)  |
| Er(1)-O(6)          | 2.613(4)   | O(6)#1-Er(1)-O(11)  | 71.56(13)  |
| O(11)-Er(1)-O(4)#2  | 76.30(13)  | O(9)-Er(1)-O(11)    | 140.39(14) |
| O(1)-Er(1)-O(5)     | 79.48(13)  | O(1)-Er(1)-O(4)#2   | 126.56(13) |
| O(10)-Er(1)-O(5)    | 77.04(14)  | O(10)-Er(1)-O(4)#2  | 75.88(14)  |
| O(6)#1-Er(1)-O(5)   | 119.00(12) | O(6)#1-Er(1)-O(4)#2 | 78.53(13)  |
| O(9)-Er(1)-O(5)     | 84.77(13)  | O(9)-Er(1)-O(4)#2   | 92.07(14)  |
| O(11)-Er(1)-O(5)    | 88.65(14)  | O(6)#1-Er(1)-O(3)#2 | 77.58(12)  |
| O(4)#2-Er(1)-O(5)   | 152.23(13) | O(9)-Er(1)-O(3)#2   | 69.37(13)  |
| O(1)-Er(1)-O(3)#2   | 75.43(13)  | O(11)-Er(1)-O(3)#2  | 123.92(13) |
| O(10)-Er(1)-O(3)#2  | 110.75(14) | O(4)#2-Er(1)-O(3)#2 | 52.05(12)  |
| O(3)#2-Er(1)-O(6)   | 132.12(12) | O(5)-Er(1)-O(3)#2   | 147.41(13) |
| O(5)-Er(1)-O(6)     | 54.86(11)  | O(1)-Er(1)-O(6)     | 71.65(12)  |
| O(4)#2-Er(1)-O(6)   | 136.12(12) | O(10)-Er(1)-O(6)    | 116.80(14) |
| O(11)-Er(1)-O(6)    | 70.79(13)  | O(6)#1-Er(1)-O(6)   | 64.15(14)  |
| O(9)-Er(1)-O(6)     | 131.69(13) |                     |            |
| <b>2</b>            |            |                     |            |
| Er(1)-O(2)#3        | 2.220(4)   | O(2)#3-Er(1)-O(1)#4 | 81.19(14)  |
| Er(1)-O(1)#4        | 2.281(4)   | O(2)#3-Er(1)-O(5)#3 | 85.56(14)  |
| Er(1)-O(5)#3        | 2.305(4)   | O(1)#4-Er(1)-O(5)#3 | 142.77(14) |
| Er(1)-O(6)          | 2.315(4)   | O(2)#3-Er(1)-O(6)   | 98.09(14)  |
| Er(1)-O(8)#5        | 2.375(4)   | O(1)#4-Er(1)-O(6)   | 75.05(14)  |
| Er(1)-O(4)          | 2.404(4)   | O(5)#3-Er(1)-O(6)   | 141.56(14) |
| Er(1)-O(3)#3        | 2.405(4)   | O(2)#3-Er(1)-O(8)#5 | 89.18(14)  |
| Er(1)-O(3)          | 2.445(4)   | O(1)#4-Er(1)-O(8)#5 | 72.79(13)  |
| Er(1)-Er(1)#3       | 3.8698(6)  | O(5)#3-Er(1)-O(8)#5 | 72.38(13)  |
| O(5)#3-Er(1)-O(4)   | 108.88(14) | O(6)-Er(1)-O(8)#5   | 145.47(13) |
| O(6)-Er(1)-O(4)     | 79.32(14)  | O(2)#3-Er(1)-O(4)   | 160.07(14) |
| O(8)#5-Er(1)-O(4)   | 82.55(14)  | O(1)#4-Er(1)-O(4)   | 79.05(14)  |
| O(2)#3-Er(1)-O(3)#3 | 72.76(13)  | O(1)#4-Er(1)-O(3)#3 | 133.48(13) |

---

|                     |            |                   |            |
|---------------------|------------|-------------------|------------|
| O(5)#3-Er(1)-O(3)#3 | 73.32(13)  | O(6)-Er(1)-O(3)#3 | 71.42(13)  |
| O(8)#5-Er(1)-O(3)#3 | 142.20(13) | O(4)-Er(1)-O(3)#3 | 123.81(13) |
| O(6)-Er(1)-O(3)     | 78.82(13)  | O(2)#3-Er(1)-O(3) | 145.90(13) |
| O(8)#5-Er(1)-O(3)   | 112.72(13) | O(1)#4-Er(1)-O(3) | 129.09(13) |
| O(4)-Er(1)-O(3)     | 53.43(13)  | O(5)#3-Er(1)-O(3) | 77.32(13)  |
| O(3)#3-Er(1)-O(3)   | 74.14(14)  |                   |            |

---

<sup>a</sup>Symmetry transformations used to generate equivalent atoms: #1 -x+1,-y,-z; #2 -x+1,-y+1,-z; #3 -x,-y+1,-z; #4 x,y-1,z; #5 x+1,y,z.

Table S3 Distances (Å) and angles (°) of hydrogen bonds for compounds **1-2**.

| D-H...A                | Distance (D-H) | Distance (H...A) | Distance(D...A) | Angle (D-H...A) |
|------------------------|----------------|------------------|-----------------|-----------------|
| <b>1</b>               |                |                  |                 |                 |
| O(9)-H(9A)...O(12)#3   | 0.848(10)      | 2.04(3)          | 2.804(6)        | 150(5)          |
| O(9)-H(9B)...O(3)      | 0.848(10)      | 2.021(17)        | 2.857(6)        | 168(6)          |
| O(10)-H(10A)...O(2)#3  | 0.845(10)      | 1.82(2)          | 2.651(6)        | 167(7)          |
| O(10)-H(10B)...O(8)#4  | 0.845(10)      | 1.937(14)        | 2.778(6)        | 173(7)          |
| O(10)-H(10B)...Cl(1)#4 | 0.845(10)      | 2.98(4)          | 3.735(4)        | 150(6)          |
| O(11)-H(11A)...O(1)#1  | 0.847(10)      | 1.876(14)        | 2.718(5)        | 173(6)          |
| O(11)-H(11B)...O(5)#4  | 0.846(10)      | 2.21(2)          | 3.037(6)        | 164(7)          |
| O(11)-H(11B)...O(8)#4  | 0.846(10)      | 2.65(5)          | 3.168(6)        | 121(5)          |
| O(11)-H(11B)...Cl(1)#4 | 0.846(10)      | 2.91(3)          | 3.677(4)        | 151(5)          |
| O(12)-H(12A)...O(4)    | 0.851(10)      | 2.029(19)        | 2.869(6)        | 169(8)          |
| O(12)-H(12B)...O(8)#5  | 0.848(10)      | 2.40(5)          | 3.041(6)        | 132(5)          |
| O(13)-H(13A)...O(7)#6  | 0.845(10)      | 2.37(3)          | 3.171(7)        | 159(7)          |
| O(13)-H(13B)...O(8)#7  | 0.844(11)      | 2.06(2)          | 2.893(7)        | 168(9)          |
| O(13)-H(13B)...Cl(1)#7 | 0.844(11)      | 2.99(6)          | 3.688(6)        | 142(7)          |
| O(14)-H(14A)...O(7)    | 0.850(10)      | 1.93(2)          | 2.773(7)        | 168(8)          |
| O(14)-H(14B)...O(13)#8 | 0.849(10)      | 2.04(3)          | 2.862(8)        | 164(9)          |
| N(1)-H(1)...O(14)      | 0.86           | 1.98             | 2.761(7)        | 150.3           |
| N(1)-H(1)...O(12)#6    | 0.86           | 2.46             | 2.990(7)        | 120.9           |
| $\pi \dots \pi^a$      |                |                  | 3.569           |                 |
| $\pi \dots \pi^b$      |                |                  | 3.835           |                 |
| <b>2</b>               |                |                  |                 |                 |
| N(1)-H(1)...O(8)#9     | 0.86           | 2.11             | 2.945(6)        | 163.0           |
| N(1)-H(1)...O(1)#10    | 0.86           | 2.46             | 2.886(6)        | 111.3           |
| C(7)-H(7)...O(8)#9     | 0.930          | 2.543(5)         | 3.469(5)        | 173.6           |
| $\pi \dots \pi^a$      |                |                  | 3.514 and 3.751 |                 |

\*Symmetry transformation used to generate equivalent atoms: #1 -x+1,-y,-z; #2 -x+1,-y+1,-z; #3 x+1,y,z; #4 -x+2,-y,-z; #5 x-1,y+1,z; #6 -x+1,-y+1,-z+1; #7 -x+2,-y+1,-z+1; #8 x,y-1,z; #9 -x,-y+1,-z+1; #10 -x+1,-y+2,-z+1.  $\pi \dots \pi^a$  denotes the centroid-to-centroid distance (Å) between the adjacent benzene ring and imidazole ring, and  $\pi \dots \pi^b$  denotes the centroid-to-centroid distance (Å) between two imidazole rings from two adjacent layers.

Figure S1

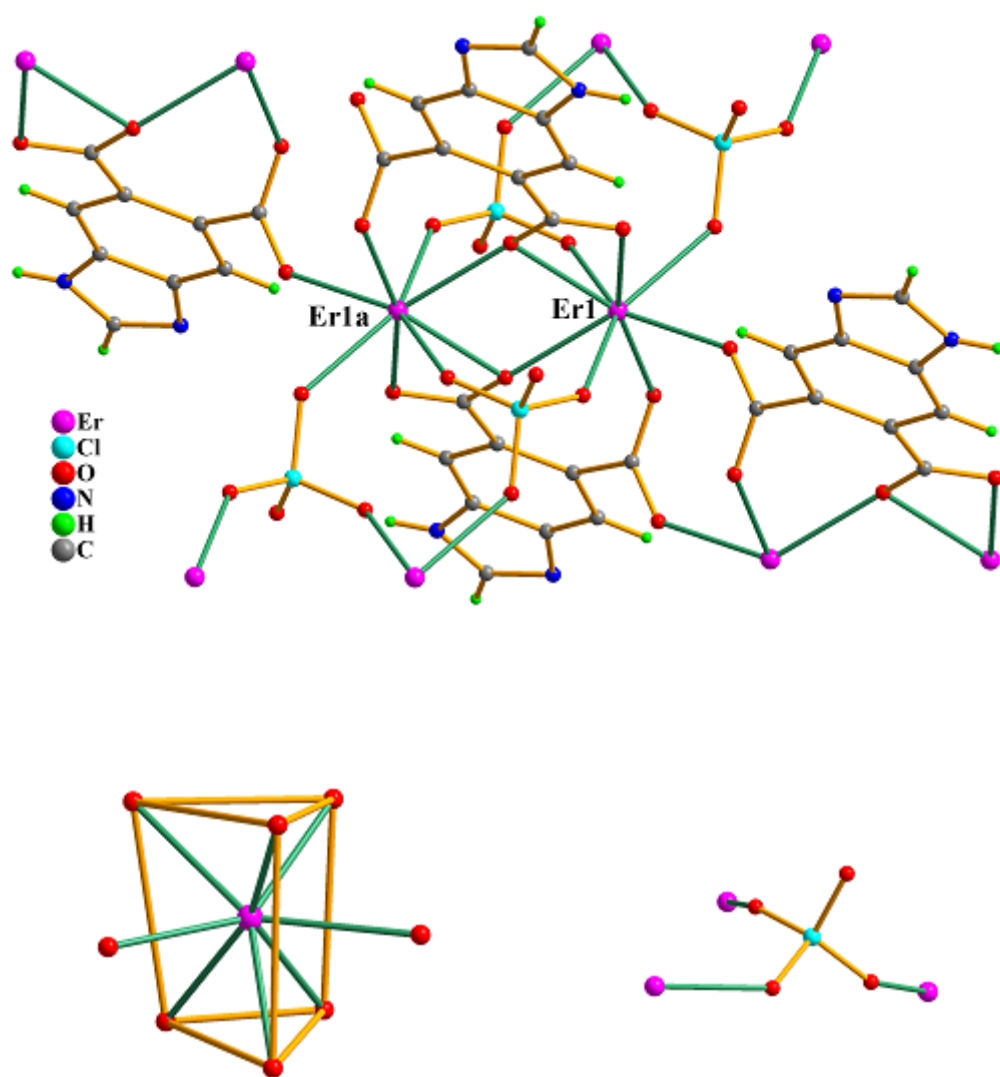

**Figure S2**

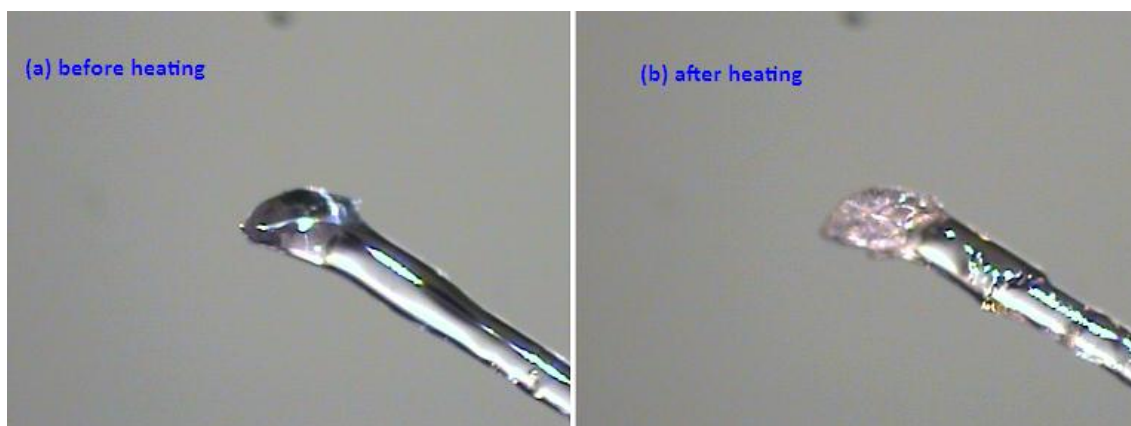

**Figure S3**

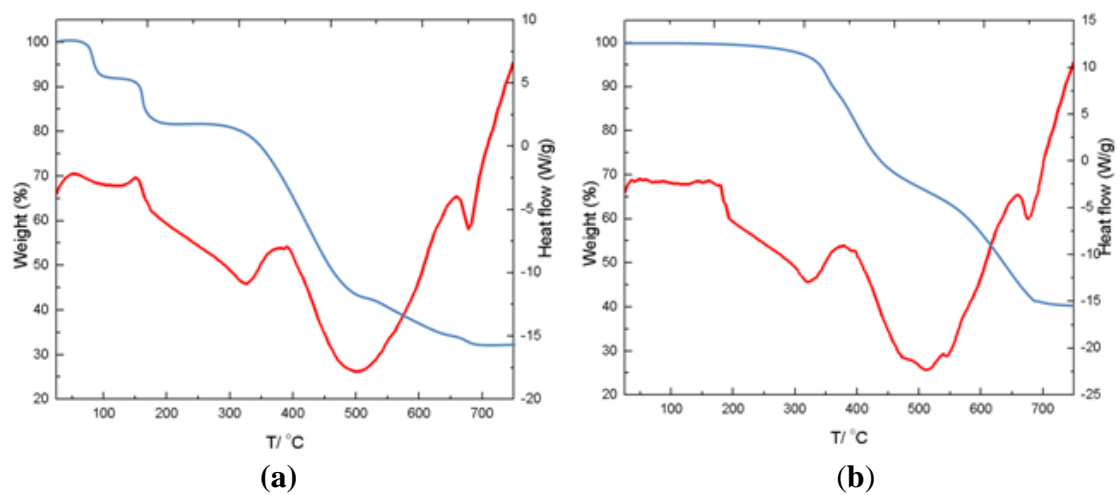



Figure S4.

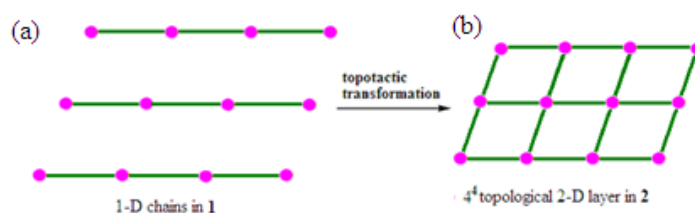

From above figure S4 (a, b), the topotactic behavior was happened in this system, each dinuclear Er(III) can be viewed as node in both **1** and **2**, and node-and-linker 1-D chain was formed for **1**, while (4,4) topology was simplified for **2**. With increase of the temperature, Er<sup>3+</sup> ions as well as conformational changes of ligand bidc<sup>2-</sup> underwent upward and downward/left and right movement, and the weak interaction between 1-D chains in complex **1** was changed into coordination bonding interaction, and then adjacent chains are connected with each other to form the 2-D framework, which finally resulted in the structural transformation to coordination polymer **2**. Although both crystals **1** and **2** were crystallized in the same triclinic space group *P*-1, however, the cell volume of **2** decreased 273 Å<sup>3</sup>, stemming from the departure of three coordinated and three lattice water molecules in **1**. Therefore, the single crystal transformation between **1** and **2** is maybe ascribes to hydrogen bond transform to coordination bond after increasing temperature.

## checkCIF/PLATON (full publication check)

No syntax errors found.  
Please wait while processing ....

CIF dictionary  
Interpreting this report

### Datablock: [CCDC 897010\(1\)](#)

Bond precision: C-C = 0.0076 Å Wavelength=0.71073

Cell: a=7.1312(12) b=9.5963(16) c=12.431(2)  
alpha=100.546(2) beta=98.090(2) gamma=95.025(2)

Temperature: 298 K

|                        | Calculated                   | Reported            |
|------------------------|------------------------------|---------------------|
| Volume                 | 822.4(2)                     | 822.4(2)            |
| Space group            | P -1                         | P-1                 |
| Hall group             | -P 1                         | ?                   |
| Moiety formula         | C9 H10 Cl Er N2 O11, 3(H2 O) | ?                   |
| Sum formula            | C9 H16 Cl Er N2 O14          | C9 H16 Cl Er N2 O14 |
| Mr                     | 578.95                       | 578.95              |
| Dx, g cm <sup>-3</sup> | 2.338                        | 2.338               |
| Z                      | 2                            | 2                   |
| Mu (mm <sup>-1</sup> ) | 5.347                        | 5.347               |
| F000                   | 562.0                        | 562.0               |
| F000'                  | 562.14                       |                     |
| h, k, lmax             | 8, 11, 14                    | 8, 11, 14           |
| Nref                   | 2961                         | 2896                |
| Tmin, Tmax             | 0.304, 0.526                 | 0.373, 0.566        |
| Tmin'                  | 0.281                        |                     |

Correction method= MULTI-SCAN

Data completeness= 0.978 Theta(max)= 25.200

R(reflections)= 0.0283( 2758) wR2(reflections)= 0.0764( 2896)

S = 1.043 Npar= 281

The following ALERTS were generated. Each ALERT has the format

**test-name\_ALERT\_alert-type\_alert-level.**

Click on the hyperlinks for more details of the test.

#### ●Alert level C

|                   |                                      |                          |            |           |
|-------------------|--------------------------------------|--------------------------|------------|-----------|
| PLAT029_ALERT_3_C | _diffn_measured_fraction_theta_full  | Low                      | .....      | 0.978     |
| PLAT048_ALERT_1_C | MoietyFormula                        | Not Given                | .....      | ?         |
| PLAT125_ALERT_4_C | No '_symmetry_space_group_name_Hall' | Given                    | .....      | ?         |
| PLAT213_ALERT_2_C | Atom C4                              | has ADP max/min Ratio    | .....      | 3.2 prola |
| PLAT417_ALERT_2_C | Short Inter D-H..H-D                 | H13B .. H14B ..          | 2.11 Ang.  |           |
| PLAT480_ALERT_4_C | Long H...A H-Bond                    | Reported H10B .. CL1 ..  | 2.98 Ang.  |           |
| PLAT480_ALERT_4_C | Long H...A H-Bond                    | Reported H11B .. O8 ..   | 2.65 Ang.  |           |
| PLAT480_ALERT_4_C | Long H...A H-Bond                    | Reported H11B .. CL1 ..  | 2.91 Ang.  |           |
| PLAT480_ALERT_4_C | Long H...A H-Bond                    | Reported H13B .. CL1 ..  | 2.99 Ang.  |           |
| PLAT732_ALERT_1_C | Angle Calc                           | 114(7), Rep 113(3) ..... | 2.33 su-Ra |           |
|                   | H14B -O14 -H14A                      | 1.555 1.555 1.555 # 74   |            |           |
| PLAT732_ALERT_1_C | Angle Calc                           | 114(7), Rep 113(3) ..... | 2.33 su-Ra |           |
|                   | H14A -O14 -H14B                      | 1.555 1.555 1.555 # 76   |            |           |

#### ●Alert level G

|                   |                                                  |       |              |
|-------------------|--------------------------------------------------|-------|--------------|
| PLAT002_ALERT_2_G | Number of Distance or Angle Restraints on AtSite | 18    |              |
| PLAT004_ALERT_5_G | Info: Polymeric Structure Found with Dimension   | 1     |              |
| PLAT005_ALERT_5_G | No _iucr_refine_instructions_details in CIF      | ..... | ?            |
| PLAT007_ALERT_5_G | Note: Number of Unrefined D-H Atoms              | ..... | 1            |
| PLAT083_ALERT_2_G | SHELXL Second Parameter in WGHT Unusually Large. | 7.48  |              |
| PLAT154_ALERT_1_G | The su's on the Cell Angles are Equal            | ..... | 0.00200 Deg. |



## checkCIF/PLATON (full publication check)

No syntax errors found.  
Please wait while processing ....

CIF dictionary  
Interpreting this report

## Datablock: CCDC 897011 (2)

Bond precision: C-C = 0.0076 Å Wavelength=0.71073  
Cell: a=6.8722 (9) b=7.8857 (11) c=10.9592 (15)  
alpha=101.529 (2) beta=106.681 (2) gamma=95.551 (2)

Temperature: 298 K

|                        | Calculated        | Reported          |
|------------------------|-------------------|-------------------|
| Volume                 | 549.87 (13)       | 549.87 (13)       |
| Space group            | P -1              | P-1               |
| Hall group             | -P 1              | ?                 |
| Moiety formula         | C9 H4 Cl Er N2 O8 | ?                 |
| Sum formula            | C9 H4 Cl Er N2 O8 | C9 H4 Cl Er N2 O8 |
| Mr                     | 470.85            | 470.85            |
| Dx, g cm <sup>-3</sup> | 2.844             | 2.844             |
| Z                      | 2                 | 2                 |
| Mu (mm <sup>-1</sup> ) | 7.923             | 7.923             |
| F000                   | 442.0             | 442.0             |
| F000'                  | 442.04            |                   |
| h, k, lmax             | 8, 9, 13          | 8, 9, 13          |
| Nref                   | 1994              | 1958              |
| Tmin, Tmax             | 0.148, 0.281      | 0.233, 0.364      |
| Tmin'                  | 0.117             |                   |

Correction method= MULTI-SCAN  
Data completeness= 0.982 Theta(max)= 25.250  
R(reflections)= 0.0241 ( 1833) wR2(reflections)= 0.0594 ( 1958)  
S = 1.021 Npar= 190

The following ALERTS were generated. Each ALERT has the format

**test-name\_ALERT\_alert-type\_alert-level.**

Click on the hyperlinks for more details of the test.

### ● Alert level C

PLAT048\_ALERT\_1\_C MoietyFormula Not Given ..... ?  
PLAT125\_ALERT\_4\_C No '\_symmetry\_space\_group\_name\_Hall' Given ..... ?  
PLAT774\_ALERT\_1\_C Suspect X-Y Bond in CIF: ER1 -- ER1 .. 3.87 Ang.

### ● Alert level G

PLAT004\_ALERT\_5\_G Info: Polymeric Structure Found with Dimension . 2  
PLAT005\_ALERT\_5\_G No '\_iucr\_refine\_instructions\_details' in CIF .... ?  
PLAT007\_ALERT\_5\_G Note: Number of Unrefined D-H Atoms ..... 1  
PLAT154\_ALERT\_1\_G The su's on the Cell Angles are Equal ..... 0.00200 Deg.  
PLAT764\_ALERT\_4\_G Overcomplete CIF Bond List Detected (Rep/Expd) . 1.21 Ratio

0 **ALERT level A** = Most likely a serious problem - resolve or explain

0 **ALERT level B** = A potentially serious problem, consider carefully

3 **ALERT level C** = Check. Ensure it is not caused by an omission or oversight

5 **ALERT level G** = General information/check it is not something unexpected
